# Supplementary material for: Sustainable Water Treatment with Induced Bank Filtration
Source: MDPI journal article supplement (doi:10.3390/w15020361), 2023-01-16
Supplement: s1 [file s1]

## Supporting Information

**Table S1.** Laboratory results from tests performed Feb 24, 2019.

| Test Parameter                   | Units      | Testin<br>g Limit | Tap       | Pharta    | Nag Zhar<br>(spring) | Bore<br>Well | Indian Standards BIS IS:<br>10500 |                      |
|----------------------------------|------------|-------------------|-----------|-----------|----------------------|--------------|-----------------------------------|----------------------|
| Testing name:                    |            |                   | NS-1      | NS-2      | NS-3                 | NS-4         | Requireme<br>nt                   | Permissable<br>Limit |
| Color                            | n<br>Units | 1                 | -         | -         | -                    | -            | 5                                 | 15                   |
| Odour                            | NA         | NA                | Aggreable | Aggreable | Aggreable            | Aggreable    | Aggreable                         | Aggreable            |
| Taste                            | NA         | NA                | Aggreable | Aggreable | Aggreable            | Aggreable    | Aggreable                         | Aggreable            |
| Turbidity                        | NTU        | 1                 | -         | -         | -                    | -            | 1                                 | 5                    |
| Total dissolved<br>solids        | mg/L       | 1                 | 21.00     | 14.00     | 34.00                | 79.00        | 500                               | 2000                 |
| pH                               | NA         | 1                 | 7.43      | 6.79      | 6.53                 | 6.66         | 6.5-8.5                           | no relaxation        |
| Boron B                          | mg/L       | 0.005             | 0.006     | 0.006     | 0.006                | 0.008        | 0.5                               | 1.0                  |
| Bicarbonates                     | mg/L       | 10                | 19.80     | 9.90      | 19.80                | 89.10        | NA                                | NA                   |
| Copper Cu                        | mg/L       | 0.001             | -         | -         | -                    | -            | 0.05                              | 1.5                  |
| Carbonates                       | mg/L       | 1                 | -         | -         | -                    | -            | NA                                | NA                   |
| Nitrate NO3                      | mg/L       | 0.1               | 0.63      | -         | 0.21                 | 1.32         | 45                                | no relaxation        |
| Nitrite NO2                      | mg/L       | 0.01              | -         | -         | -                    | -            | NA                                | NA                   |
| Flouride F                       | mg/L       | 0.1               | 0.25      | -         | -                    | 0.16         | 1.0                               | 1.5                  |
| Zinc Zn                          | mg/L       | 0.005             | 0.006     | -         | 0.005                |              | 5                                 | 15                   |
| Silver Ag                        | mg/L       | 0.001             | -         | -         | -                    | -            | 0.1                               | no relaxation        |
| Total suspended<br>solid         | mg/L       | 10                | -         | 0.002     | 0.002                | 0.002        | NA                                | NA                   |
| Fixed solids                     | mg/L       | 10                | -         | 0.002     | 0.002                | 0.002        | NA                                | NA                   |
| Chloride Cl                      | mg/L       | 5                 | 12.41     | 10.64     | 9.31                 | 14.18        | 250                               | 1000                 |
| Selenium Se                      | mg/L       | 0.005             | -         | -         | -                    | -            | 0.01                              | no relaxation        |
| Sulphate SO4                     | mg/L       | 0.1               | 0.96      | 0.29      | 1.00                 | 0.77         | 200                               | 400                  |
| Alkalinity to<br>phenolphthalein | mg/L       | 1                 | -         | -         | -                    | -            | NA                                | NA                   |
| Calcium Ca                       | mg/L       | 1.0               | 3.23      | 10.50     | 5.56                 | 13.73        | 75                                | 200                  |
| Total alkalinity<br>CaCO3        | mg/L       | 1                 | 19.80     | 9.90      | 9.80                 | 89.10        | 200                               | 600                  |
| Magnesium Mg                     | mg/L       | 5                 | -         | -         | -                    | -            | 30                                | 100                  |
| Sodium Na                        | mg/L       | 1                 | -         | -         | -                    | -            | NA                                | NA                   |
| Potassium K                      | mg/L       | 1                 | -         | -         | -                    | -            | NA                                | NA                   |
| Residual free<br>chloride        | mg/L       | 0.1               | -         | -         | -                    | -            | NA                                | NA                   |
| Phenolic<br>compounds            | mg/L       | 0.001             | -         | -         | -                    | -            | 0.001                             | 0.002                |
| Ammonical<br>nitrogen            | mg/L       | 1                 | -         | -         | -                    | -            | NA                                | NA                   |
| Total hardness<br>CaCO3          | mg/L       | 1.0               | 8.08      | 28.28     | 18.18                | 36.36        | 200                               | 600                  |
| Iron Fe                          | mg/L       | 0.005             | 0.018     | -         | -                    | -            | 0.3                               | no relaxation        |

|                                             |              |                      |                     |               |                          |                           |                    |                          |
|---------------------------------------------|--------------|----------------------|---------------------|---------------|--------------------------|---------------------------|--------------------|--------------------------|
| Manganese Mn                                | mg/L         | 0.001                | -                   | 0.03          | 0.00                     | 0.00                      | 0.1                | 0.3                      |
| Cadmium Cd                                  | mg/L         | 0.001                | -                   | -             | -                        | -                         | 0.003              | no relaxation            |
| Lead Pb                                     | mg/L         | 0.001                | -                   | -             | -                        | -                         | 0.01               | no relaxation            |
| Mercury Hg                                  | mg/L         | 0.0005               | -                   | -             | -                        | -                         | 0.001              | no relaxation            |
| Molybdenum Mo                               | mg/L         | 0.001                | -                   | -             | -                        | -                         | 0.07               | no relaxation            |
| Nickel Ni                                   | mg/L         | 0.005                | -                   | -             | -                        | -                         | 0.02               | no relaxation            |
| Arsenic As                                  | mg/L         | 0.001                | -                   | -             | -                        | -                         | 0.01               | 0.05                     |
| Chromium Cr                                 | mg/L         | 0.001                | -                   | -             | -                        | 0.002                     | 0.05               | no relaxation            |
| Lithium Li                                  | mg/L         | 0.001                | -                   | -             | 0.003                    | 0.006                     | NA                 | NA                       |
| Reactive silica                             | mg/L         | 0.05                 | -                   | -             | -                        | -                         | NA                 | NA                       |
| Tin Sn                                      | mg/L         | 0.001                | -                   | -             | -                        | -                         | NA                 | NA                       |
| Vanadium V                                  | mg/L         | 0.001                | -                   | -             | -                        | -                         | NA                 | NA                       |
| <b>Pesticides:</b>                          | <b>Units</b> | <b>Testing Limit</b> | <b>House (tap)</b>  | <b>Pharta</b> | <b>Nag Zhar (spring)</b> | <b>(borewell)</b>         | <b>Limit</b>       |                          |
| Chlorpyrifos                                | ug/L         | 0.01                 | -                   | -             | -                        | -                         | 30                 |                          |
| Methyl Parathion                            | ug/L         | 0.01                 | -                   | -             | -                        | -                         | 0.3                |                          |
| Monocrotophos                               | ug/L         | 0.01                 | -                   | -             | -                        | -                         | 1                  |                          |
| Phorate                                     | ug/L         | 0.01                 | -                   | -             | -                        | -                         | 2                  |                          |
| Imidocloprid                                | ug/L         | 0.01                 | -                   | -             | -                        | -                         | NA                 |                          |
| Bromodiolone                                | ug/L         | Qual                 | -                   | -             | -                        | -                         | NA                 |                          |
| Fipronil                                    | ug/L         | 0.01                 | -                   | -             | -                        | -                         | NA                 |                          |
| Aldrin/Dieldrin                             | ug/L         | 0.01                 | -                   | -             | -                        | -                         | 0.03               |                          |
| Endosulfan (sum of Ipha, Beta, and Sulfate) | ug/L         | 0.01                 | -                   | -             | -                        | -                         | 0.4                |                          |
| DDT (O,P and P,p isomers of DDT, DDD, DDE)  | ug/L         | 0.01                 | -                   | -             | -                        | -                         | 1                  |                          |
| COD                                         | mg/L         | 3.0                  | 20.00               | 70.00         | 40.00                    | 30.00                     | NA                 |                          |
| BOD                                         | mg/L         | 5.0                  | -                   | 10.00         | 6.00                     | -                         | NA                 |                          |
| <b>Handheld Results:</b>                    |              |                      | <b>Subash House</b> | <b>Pharta</b> | <b>Nag Zhar (spring)</b> | <b>My Well (borewell)</b> | <b>Requirement</b> | <b>Permissible Limit</b> |
| pH                                          | -            |                      | 6.62                | 5.24          | 5.22                     | 5.76                      | 6.5-8.5            | no relaxation            |
| TDS                                         | ppm          |                      | 21                  | 21            | 28                       | 54                        | 500                | 2000                     |
| EC                                          | us/cm        |                      | 42                  | 42            | 54                       | 128                       | NA                 | NA                       |
| Temp                                        | F            |                      | 70.1                | 70.5          | 71.6                     | 76.1                      | NA                 | NA                       |
